# Supplementary material for: Application of a framework to guide genetic testing communication across clinical indications
Source: Genome Med. 2021 Apr 29;13:71. doi: 10.1186/s13073-021-00887-x (PMC8086064; doi:10.1186/s13073-021-00887-x)
Supplement: Supplementary file 2 — Additional file 2: Supplementary Table S1. All CADRe communication recommendations for the standard testing indications. [file 13073_2021_887_MOESM2_ESM.xlsx]

## Sheet: Table S1
	Table S1: CADRe Communication Recommendations, Standard Testing Indications
		Pre-Test					Post-test Pathogenic/Likely Pathogenic					Post-test Benign/Likely Benign/No Variant
	Condition(s)	Confirmatory Testing	Concerning Personal History	Concerning Family History	Familial Variant		Confirmatory Testing	Concerning Personal History	Concerning Family History	Familial Variant		Confirmatory Testing	Concerning Personal History	Concerning Family History	Familial Variant
Cancer	Hereditary breast and ovarian cancer		Targeted Discussion	Targeted Discussion	Brief Communication			Traditional Genetic Counseling	Traditional Genetic Counseling	Traditional Genetic Counseling			Targeted Discussion	Targeted Discussion	Brief Communication
	Moderate breast cancer risk		Targeted Discussion	Targeted Discussion	Brief Communication			Traditional Genetic Counseling	Traditional Genetic Counseling	Traditional Genetic Counseling			Targeted Discussion	Targeted Discussion	Brief Communication
	Limited breast cancer risk		Targeted Discussion	Targeted Discussion	Brief Communication*			Traditional Genetic Counseling	Traditional Genetic Counseling	Traditional Genetic Counseling			Targeted Discussion	Targeted Discussion	Brief Communication
	Lynch syndrome	Brief Communication	Targeted Discussion	Targeted Discussion	Brief Communication		Targeted Discussion	Traditional Genetic Counseling	Traditional Genetic Counseling	Traditional Genetic Counseling		Targeted Discussion	Targeted Discussion	Targeted Discussion	Brief Communication
	Moderate colon cancer risk		Targeted Discussion	Targeted Discussion	Brief Communication			Traditional Genetic Counseling	Traditional Genetic Counseling	Traditional Genetic Counseling			Targeted Discussion	Targeted Discussion	Brief Communication
	MEN2 and familial medullary thyroid cancer	Brief Communication	Targeted Discussion	Targeted Discussion	Brief Communication		Targeted Discussion	Traditional Genetic Counseling	Traditional Genetic Counseling	Traditional Genetic Counseling^		Targeted Discussion	Targeted Discussion	Targeted Discussion	Brief Communication
	Juvenile polyposis	Brief Communication	Targeted Discussion	Targeted Discussion	Brief Communication		Targeted Discussion	Traditional Genetic Counseling	Traditional Genetic Counseling	Traditional Genetic Counseling		Targeted Discussion	Targeted Discussion	Targeted Discussion	Brief Communication
	Li-Fraumeni syndrome	Brief Communication	Targeted Discussion	Targeted Discussion	Brief Communication		Targeted Discussion	Traditional Genetic Counseling	Traditional Genetic Counseling	Traditional Genetic Counseling		Targeted Discussion	Targeted Discussion	Targeted Discussion	Brief Communication
	Multiple endocrine neoplasia type 1	Brief Communication	Targeted Discussion	Targeted Discussion	Brief Communication		Targeted Discussion	Traditional Genetic Counseling	Traditional Genetic Counseling	Traditional Genetic Counseling		Targeted Discussion	Targeted Discussion	Targeted Discussion	Brief Communication
	Peutz-Jeghers syndrome	Brief Communication	Targeted Discussion	Targeted Discussion	Brief Communication		Targeted Discussion	Traditional Genetic Counseling^	Traditional Genetic Counseling^	Traditional Genetic Counseling^		Targeted Discussion	Targeted Discussion	Targeted Discussion	Brief Communication
	Familial adenomatous polyposis	Brief Communication	Targeted Discussion	Targeted Discussion	Brief Communication		Targeted Discussion	Traditional Genetic Counseling	Traditional Genetic Counseling	Traditional Genetic Counseling		Targeted Discussion	Targeted Discussion	Targeted Discussion	Brief Communication
	Von Hippel–Lindau syndrome	Brief Communication	Targeted Discussion	Targeted Discussion	Brief Communication		Targeted Discussion	Traditional Genetic Counseling	Traditional Genetic Counseling	Traditional Genetic Counseling		Targeted Discussion	Targeted Discussion	Targeted Discussion	Brief Communication
	Retinoblastoma	Brief Communication	Targeted Discussion^	Targeted Discussion^	Brief Communication		Targeted Discussion	Traditional Genetic Counseling	Traditional Genetic Counseling	Traditional Genetic Counseling		Targeted Discussion	Targeted Discussion	Targeted Discussion	Brief Communication
	Hereditary paraganglioma- pheochromocytoma syndrome		Targeted Discussion	Targeted Discussion	Brief Communication			Traditional Genetic Counseling	Traditional Genetic Counseling^	Traditional Genetic Counseling			Targeted Discussion	Targeted Discussion	Brief Communication
	MYH-associated polyposis		Brief Communication	Brief Communication	Brief Communication			Targeted Discussion	Targeted Discussion	Targeted Discussion			Targeted Discussion	Targeted Discussion	Brief Communication
Peds Cancer	Tuberous sclerosis complex	Brief Communication	Targeted Discussion	Targeted Discussion	Brief Communication		Targeted Discussion	Traditional Genetic Counseling	Traditional Genetic Counseling	Traditional Genetic Counseling		Targeted Discussion	Targeted Discussion	Targeted Discussion	Brief Communication
	PTEN hamartoma tumor syndrome	Brief Communication	Targeted Discussion	Targeted Discussion	Brief Communication		Targeted Discussion	Traditional Genetic Counseling	Traditional Genetic Counseling	Traditional Genetic Counseling		Targeted Discussion	Targeted Discussion	Targeted Discussion	Brief Communication
	Neurofibromatosis type 2	Brief Communication	Targeted Discussion	Targeted Discussion	Brief Communication		Targeted Discussion	Traditional Genetic Counseling	Traditional Genetic Counseling	Traditional Genetic Counseling		Targeted Discussion	Targeted Discussion	Targeted Discussion	Brief Communication
Cardio	Marfan syndrome, Loeys-Dietz syndromes, and FTAAD	Brief Communication	Targeted Discussion	Targeted Discussion	Brief Communication		Targeted Discussion	Traditional Genetic Counseling	Traditional Genetic Counseling	Traditional Genetic Counseling		Targeted Discussion	Targeted Discussion	Targeted Discussion	Brief Communication
	Ehlers-Danlos syndrome, vascular type	Brief Communication	Targeted Discussion	Targeted Discussion	Brief Communication		Targeted Discussion	Traditional Genetic Counseling	Traditional Genetic Counseling	Traditional Genetic Counseling		Targeted Discussion	Targeted Discussion	Targeted Discussion	Brief Communication
	Familial hypercholesterolemia	Brief Communication	Brief Communication	Brief Communication	Brief Communication		Targeted Discussion	Targeted Discussion	Targeted Discussion	Targeted Discussion		Targeted Discussion	Targeted Discussion	Targeted Discussion	Brief Communication
	Catecholaminergic polymorphic ventricular tachycardia	Brief Communication	Targeted Discussion	Targeted Discussion	Brief Communication		Targeted Discussion	Traditional Genetic Counseling	Traditional Genetic Counseling	Traditional Genetic Counseling		Targeted Discussion	Targeted Discussion	Targeted Discussion	Brief Communication
	Romano-Ward long-QT syndrome, Brugada syndrome	Brief Communication	Targeted Discussion	Targeted Discussion	Brief Communication		Targeted Discussion	Traditional Genetic Counseling	Traditional Genetic Counseling	Traditional Genetic Counseling		Targeted Discussion	Targeted Discussion	Targeted Discussion	Brief Communication
	Hypertrophic cardiomyopathy, dilated cardiomyopathy	Brief Communication	Targeted Discussion	Targeted Discussion	Brief Communication		Targeted Discussion	Traditional Genetic Counseling	Traditional Genetic Counseling	Traditional Genetic Counseling		Targeted Discussion	Targeted Discussion	Targeted Discussion	Brief Communication
	Moderate Evidence HCM	Brief Communication	Targeted Discussion	Targeted Discussion	Targeted Discussion**		Targeted Discussion	Traditional Genetic Counseling	Traditional Genetic Counseling	Traditional Genetic Counseling		Targeted Discussion	Targeted Discussion	Targeted Discussion	Brief Communication
	Limited Evidence HCM	Targeted Discussion**	Targeted Discussion	Targeted Discussion								Targeted Discussion	Targeted Discussion	Targeted Discussion
	Arrhythmogenic right ventricular cardiomyopathy	Brief Communication	Targeted Discussion	Targeted Discussion	Brief Communication		Targeted Discussion	Traditional Genetic Counseling	Traditional Genetic Counseling	Traditional Genetic Counseling		Targeted Discussion	Targeted Discussion	Targeted Discussion	Brief Communication
Other	WT1-related Wilms tumor		Targeted Discussion	Targeted Discussion	Brief Communication			Traditional Genetic Counseling	Traditional Genetic Counseling	Traditional Genetic Counseling^			Targeted Discussion	Targeted Discussion	Brief Communication
	Fabry (Male)	Brief Communication	Targeted Discussion	Targeted Discussion	Brief Communication		Targeted Discussion	Traditional Genetic Counseling	Traditional Genetic Counseling^	Traditional Genetic Counseling^		Brief Communication**	Targeted Discussion	Targeted Discussion	Brief Communication
	Fabry (Female)	Brief Communication	Targeted Discussion	Targeted Discussion	Brief Communication		Targeted Discussion	Traditional Genetic Counseling^	Traditional Genetic Counseling^	Traditional Genetic Counseling^		Targeted Discussion	Targeted Discussion	Targeted Discussion	Brief Communication
	Wilson disease	Brief Communication	Targeted Discussion	Targeted Discussion	Brief Communication		Targeted Discussion	Traditional Genetic Counseling	Traditional Genetic Counseling	Traditional Genetic Counseling		Targeted Discussion	Targeted Discussion	Targeted Discussion	Brief Communication
	Ornithine transcarbamylase deficiency	Brief Communication	Targeted Discussion	Targeted Discussion	Brief Communication*		Targeted Discussion	Traditional Genetic Counseling	Traditional Genetic Counseling	Traditional Genetic Counseling		Targeted Discussion	Targeted Discussion	Targeted Discussion	Brief Communication
	Malignant hyperthermia susceptibility	Brief Communication	Brief Communication*	Brief Communication*	Brief Communication		Targeted Discussion	Targeted Discussion	Targeted Discussion	Targeted Discussion		Targeted Discussion	Targeted Discussion	Targeted Discussion	Brief Communication
Exome	Exome		Targeted Discussion					Traditional Genetic Counseling					Brief Communication**
Neuro-logical	Huntington Disease	Targeted Discussion	Targeted Discussion	Traditional Genetic Counseling	Traditional Genetic Counseling		Targeted Discussion	Traditional Genetic Counseling	Traditional Genetic Counseling	Traditional Genetic Counseling		Targeted Discussion	Targeted Discussion	Targeted Discussion	Brief Communication
	Autosomal Dominant Dementias	Targeted Discussion	Targeted Discussion	Traditional Genetic Counseling	Traditional Genetic Counseling		Targeted Discussion	Traditional Genetic Counseling	Traditional Genetic Counseling	Traditional Genetic Counseling		Targeted Discussion	Targeted Discussion	Targeted Discussion	Brief Communication
	Frontotemporal Dementia	Targeted Discussion	Targeted Discussion	Traditional Genetic Counseling	Traditional Genetic Counseling		Targeted Discussion	Traditional Genetic Counseling	Traditional Genetic Counseling	Traditional Genetic Counseling		Targeted Discussion	Targeted Discussion	Targeted Discussion	Brief Communication
	Amyotrophic lateral sclerosis	Targeted Discussion	Targeted Discussion	Traditional Genetic Counseling	Traditional Genetic Counseling		Targeted Discussion	Traditional Genetic Counseling	Traditional Genetic Counseling	Traditional Genetic Counseling		Targeted Discussion	Targeted Discussion	Targeted Discussion	Brief Communication
	c9orf mediated FTD/ALS	Targeted Discussion	Targeted Discussion	Traditional Genetic Counseling	Traditional Genetic Counseling		Targeted Discussion	Traditional Genetic Counseling	Traditional Genetic Counseling	Traditional Genetic Counseling		Targeted Discussion	Targeted Discussion	Targeted Discussion	Brief Communication
	ApoE	Targeted Discussion	Targeted Discussion				Targeted Discussion	Traditional Genetic Counseling				Targeted Discussion	Targeted Discussion
	Blank boxes indicate that a particular indication did not apply to that condition (e.g., “confirmatory testing” would not apply to conditions without clinical diagnostic criteria). Recommendations that were re-assessed are denoted with: ^ when the communication level increased, * when the communication level decreased, and ** when the communication level remained unchanged.
